# Supplementary material for: How peptide/MHC presence affects the dynamics of the LC13 T-cell receptor
Source: PubMed Central journal article supplement (PMC6389892; doi:10.1038/s41598-019-38788-0), 2019-02-25
Supplement: 41598_2019_38788_MOESM1_ESM.pdf [file 41598_2019_38788_MOESM1_ESM.pdf]

## Supplementary Material

# How peptide/MHC presence affects the dynamics of the LC13 T-cell receptor

Jose Luis Dominguez Meijide<sup>1</sup>, Bernhard Knapp<sup>1,2,\*</sup>

<sup>1</sup>Department of Basic Sciences, International University of Catalonia, Spain

<sup>2</sup>Department of Statistics, Protein Informatics Group, University of Oxford

\* science.bernhard.knapp@gmail.com

H-bonds between TCR  $\alpha$ -chain and TCR  $\beta$ -chain: mean=15.28,15.05,15.79  
(diff=0.23,-0.51,-0.74; cohend=0.06,-0.14,-0.20; tvd=0.03,0.06,0.09)

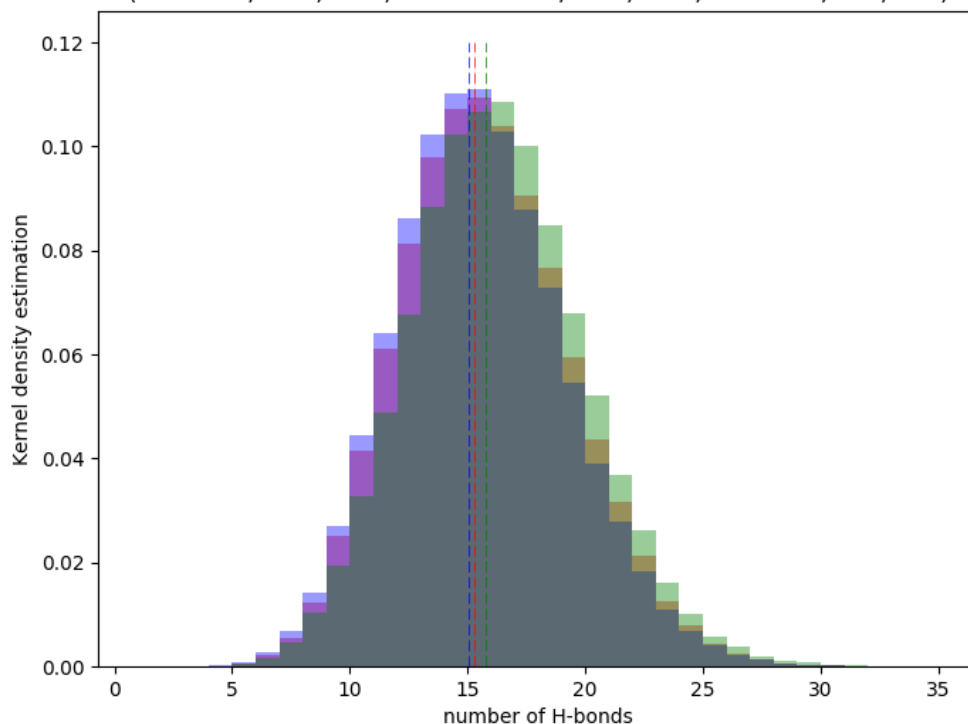

**Figure S 1: Histogram of the number of Hydrogen Bonds in the different MD trajectory sets. The dashed lines represent the mean values for TCRpMHC (red), TCRpMHC mutants complex (blue) and unbound TCR (green).**

```

----- 10 MOST FREQUENT H-BOND DIFFERENCES -----
H-bond from PRO93(D) to GLY102(D) (117.240 124.680 59.000; 121.610 123.350 59.230)
presence 0.26
H-bond from LEU94(D) to THR98(D) (118.900 126.270 55.960; 121.790 132.060 55.470)
presence -0.21
H-bond from LEU94(D) to GLY97(D) (118.900 126.270 55.960; 121.510 129.590 52.570)
presence -0.21
H-bond from GLY97(E) to TYR100(E) (128.280 117.300 59.370; 123.210 116.140 58.040)
presence -0.19
H-bond from THR30(D) to ALA95(D) (117.230 126.140 47.980; 117.100 129.610 55.530)
presence -0.18
H-bond from ASN51(E) to GLU52(E) (135.420 119.680 65.550; 137.060 122.030 68.130)
presence -0.14
H-bond from PRO93(D) to THR98(D) (117.240 124.680 59.000; 121.790 132.060 55.470)
presence -0.13
H-bond from TRP34(E) to SER75(E) (123.850 122.440 71.940; 131.740 118.720 75.030)
presence 0.13
H-bond from SER99(D) to GLY102(D) (122.010 129.160 57.940; 121.610 123.350 59.230)
presence -0.12
H-bond from TYR100(D) to GLN106(E) (124.140 125.930 57.950; 121.090 115.270 64.020)
presence -0.11

```

**Table S 1: 10 highest H-bond frequency differences between TCR and TCRpMHC-WT simulations.**

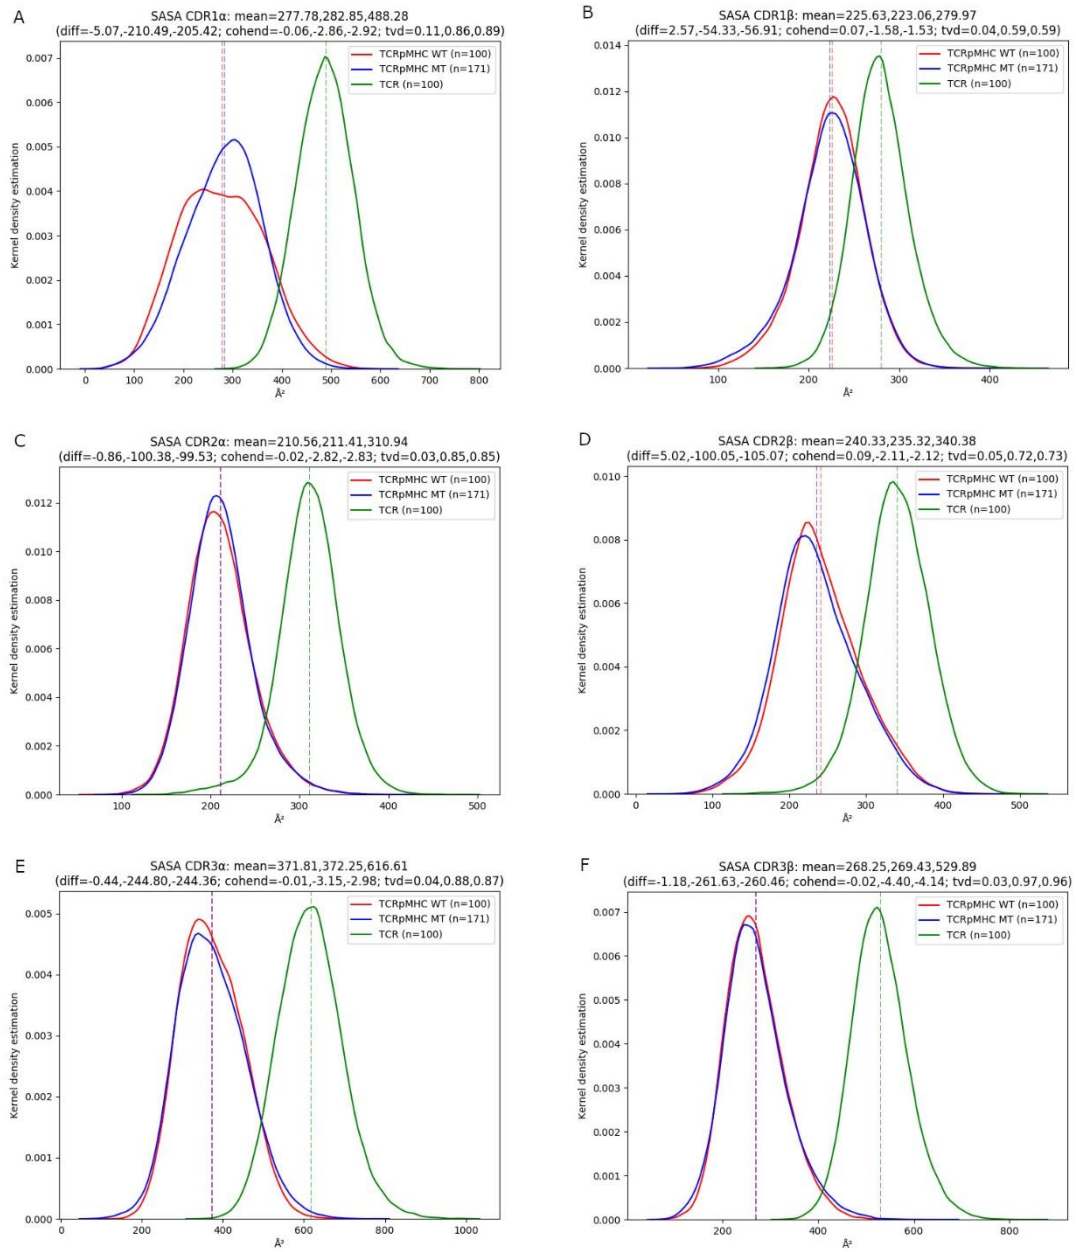

Figure S 2: SASA of the six CDR loops. A: CDR1 $\alpha$ . B: CDR1 $\beta$ . C: CDR2 $\alpha$ . D: CDR2 $\beta$ . E: CDR3 $\alpha$ . F: CDR3 $\beta$ .

### Pearson correlation coefficients of mutants

|                                                          |                         | cc            | p-value      |
|----------------------------------------------------------|-------------------------|---------------|--------------|
| distance between CDR1a and CDR1 $\beta$                  | molecular weight        | -0,018        | 0,814        |
| distance between CDR1a and CDR1 $\beta$                  | hydrophobicity          | -0,021        | 0,788        |
| distance between CDR1a and CDR1 $\beta$                  | immunogenicity          | 0,064         | 0,407        |
| distance between CDR2a and CDR2 $\beta$                  | molecular weight        | 0,076         | 0,324        |
| <b>distance between CDR2a and CDR2<math>\beta</math></b> | <b>hydrophobicity</b>   | <b>-0,150</b> | <b>0,049</b> |
| distance between CDR2a and CDR2 $\beta$                  | immunogenicity          | 0,048         | 0,533        |
| <b>distance between CDR3a and CDR3<math>\beta</math></b> | <b>molecular weight</b> | <b>-0,197</b> | <b>0,010</b> |
| distance between CDR3a and CDR3 $\beta$                  | hydrophobicity          | 0,055         | 0,471        |
| distance between CDR3a and CDR3 $\beta$                  | immunogenicity          | 0,018         | 0,810        |
| RMSF TCR (backbone)                                      | molecular weight        | 0,026         | 0,740        |
| RMSF TCR (backbone)                                      | hydrophobicity          | -0,147        | 0,054        |
| RMSF TCR (backbone)                                      | immunogenicity          | 0,108         | 0,160        |
| H-bonds between TCR a-chain and TCR $\beta$ -chain       | molecular weight        | 0,054         | 0,483        |
| H-bonds between TCR a-chain and TCR $\beta$ -chain       | hydrophobicity          | 0,060         | 0,432        |
| H-bonds between TCR a-chain and TCR $\beta$ -chain       | immunogenicity          | 0,008         | 0,921        |
| SASA loop AB loop                                        | molecular weight        | -0,079        | 0,303        |
| SASA loop AB loop                                        | hydrophobicity          | 0,009         | 0,908        |
| SASA loop AB loop                                        | immunogenicity          | 0,094         | 0,222        |
| SASA loop VC linker a-chain                              | molecular weight        | 0,045         | 0,555        |
| SASA loop VC linker a-chain                              | hydrophobicity          | -0,011        | 0,888        |
| SASA loop VC linker a-chain                              | immunogenicity          | 0,025         | 0,742        |
| SASA loop VC linker $\beta$ -chain                       | molecular weight        | -0,100        | 0,192        |
| SASA loop VC linker $\beta$ -chain                       | hydrophobicity          | -0,065        | 0,400        |
| SASA loop VC linker $\beta$ -chain                       | immunogenicity          | 0,057         | 0,457        |
| SASA H3                                                  | molecular weight        | -0,081        | 0,292        |
| SASA H3                                                  | hydrophobicity          | 0,056         | 0,465        |
| SASA H3                                                  | immunogenicity          | 0,008         | 0,917        |
| SASA CDR1a                                               | molecular weight        | -0,010        | 0,896        |
| SASA CDR1a                                               | hydrophobicity          | -0,004        | 0,956        |
| SASA CDR1a                                               | immunogenicity          | 0,049         | 0,527        |
| SASA CDR2a                                               | molecular weight        | -0,051        | 0,507        |
| SASA CDR2a                                               | hydrophobicity          | -0,137        | 0,073        |
| SASA CDR2a                                               | immunogenicity          | 0,094         | 0,221        |
| SASA CDR3a                                               | molecular weight        | -0,011        | 0,885        |
| SASA CDR3a                                               | hydrophobicity          | -0,064        | 0,407        |
| SASA CDR3a                                               | immunogenicity          | 0,018         | 0,816        |
| <b>SASA CDR1<math>\beta</math></b>                       | <b>molecular weight</b> | <b>0,211</b>  | <b>0,006</b> |
| SASA CDR1 $\beta$                                        | hydrophobicity          | 0,039         | 0,615        |
| SASA CDR1 $\beta$                                        | immunogenicity          | -0,050        | 0,511        |
| SASA CDR2 $\beta$                                        | molecular weight        | 0,093         | 0,225        |
| SASA CDR2 $\beta$                                        | hydrophobicity          | -0,049        | 0,525        |
| SASA CDR2 $\beta$                                        | immunogenicity          | -0,054        | 0,481        |
| SASA CDR3 $\beta$                                        | molecular weight        | 0,036         | 0,641        |
| SASA CDR3 $\beta$                                        | hydrophobicity          | 0,063         | 0,414        |
| SASA CDR3 $\beta$                                        | immunogenicity          | -0,017        | 0,829        |
| gyr loop AB                                              | molecular weight        | -0,021        | 0,783        |
| gyr loop AB                                              | hydrophobicity          | 0,012         | 0,877        |
| gyr loop AB                                              | immunogenicity          | 0,026         | 0,732        |
| gyr loop VC linker a-chain                               | molecular weight        | 0,049         | 0,525        |
| gyr loop VC linker a-chain                               | hydrophobicity          | -0,020        | 0,797        |
| gyr loop VC linker a-chain                               | immunogenicity          | 0,104         | 0,175        |

|                                                    |                         |               |              |
|----------------------------------------------------|-------------------------|---------------|--------------|
| <b>gyr loop VC linker <math>\beta</math>-chain</b> | <b>molecular weight</b> | <b>-0,169</b> | <b>0,027</b> |
| gyr loop VC linker $\beta$ -chain                  | hydrophobicity          | -0,025        | 0,743        |
| gyr loop VC linker $\beta$ -chain                  | immunogenicity          | 0,040         | 0,605        |
| <b>gyr H3</b>                                      | <b>molecular weight</b> | <b>-0,180</b> | <b>0,018</b> |
| gyr H3                                             | hydrophobicity          | 0,070         | 0,364        |
| gyr H3                                             | immunogenicity          | 0,072         | 0,345        |
| gyr CDR1a                                          | molecular weight        | 0,065         | 0,400        |
| gyr CDR1a                                          | hydrophobicity          | 0,050         | 0,517        |
| gyr CDR1a                                          | immunogenicity          | -0,139        | 0,070        |
| gyr CDR2a                                          | molecular weight        | -0,047        | 0,540        |
| gyr CDR2a                                          | hydrophobicity          | 0,067         | 0,382        |
| gyr CDR2a                                          | immunogenicity          | 0,000         | 0,999        |
| <b>gyr CDR3a</b>                                   | <b>molecular weight</b> | <b>0,200</b>  | <b>0,009</b> |
| gyr CDR3a                                          | hydrophobicity          | -0,010        | 0,894        |
| gyr CDR3a                                          | immunogenicity          | -0,074        | 0,335        |
| gyr CDR1 $\beta$                                   | molecular weight        | 0,023         | 0,764        |
| gyr CDR1 $\beta$                                   | hydrophobicity          | 0,058         | 0,447        |
| gyr CDR1 $\beta$                                   | immunogenicity          | -0,043        | 0,574        |
| gyr CDR2 $\beta$                                   | molecular weight        | 0,039         | 0,610        |
| gyr CDR2 $\beta$                                   | hydrophobicity          | 0,096         | 0,209        |
| gyr CDR2 $\beta$                                   | immunogenicity          | -0,069        | 0,370        |
| gyr CDR3 $\beta$                                   | molecular weight        | 0,123         | 0,107        |
| gyr CDR3 $\beta$                                   | hydrophobicity          | -0,061        | 0,425        |
| gyr CDR3 $\beta$                                   | immunogenicity          | -0,090        | 0,239        |

**Table S 2: Correlation analysis between peptide mutant properties (molecular weight, hydrophobicity, immunogenicity) and descriptors obtained from our simulations. Correlations with a p-values < 0.05 are highlighted in yellow.**

| distance               | LC13                             | A6     | LC13                           | A6    | LC13                    | A6 | LC13                            | A6     |
|------------------------|----------------------------------|--------|--------------------------------|-------|-------------------------|----|---------------------------------|--------|
|                        | difference: TCRpMHC<br>minus TCR |        | permutation test<br>percentile |       | permutation test binary |    | only significant<br>differences |        |
| dist_bb_CDR1           | 0,089                            | 0,013  | 1,000                          | 0,659 | 1                       | 0  | 0,089                           | 0,000  |
| dist_bb_CDR2           | 0,035                            | 0,139  | 0,994                          | 1,000 | 1                       | 1  | 0,035                           | 0,139  |
| dist_bb_CDR3           | 0,068                            | -0,031 | 1,000                          | 0,095 | 1                       | 0  | 0,068                           | 0,000  |
| gyrCDR1a               | 0,006                            | -0,002 | 0,922                          | 0,458 | 0                       | 0  | 0,000                           | 0,000  |
| gyrCDR1b               | 0,001                            | 0,005  | 0,825                          | 0,995 | 0                       | 1  | 0,000                           | 0,005  |
| gyrCDR2a               | -0,003                           | 0,012  | 0,000                          | 1,000 | 1                       | 1  | -0,003                          | 0,012  |
| gyrCDR2b               | -0,006                           | 0,008  | 0,000                          | 0,970 | 1                       | 0  | -0,006                          | 0,000  |
| gyrCDR3a               | -0,030                           | 0,029  | 0,000                          | 1,000 | 1                       | 1  | -0,030                          | 0,029  |
| gyrCDR3b               | -0,015                           | -0,004 | 0,000                          | 0,289 | 1                       | 0  | -0,015                          | 0,000  |
| sasaCDR1a<br>noMHC     | 0,053                            | 0,566  | 0,829                          | 1,000 | 0                       | 1  | 0,000                           | 0,566  |
| sasaCDR1b<br>noMHC     | 0,018                            | -0,201 | 0,801                          | 0,008 | 0                       | 1  | 0,000                           | -0,201 |
| sasaCDR2a<br>noMHC     | -0,001                           | 0,210  | 0,453                          | 0,985 | 0                       | 1  | 0,000                           | 0,210  |
| sasaCDR2b<br>noMHC     | 0,024                            | -0,062 | 0,853                          | 0,138 | 0                       | 0  | 0,000                           | 0,000  |
| sasaCDR3a<br>noMHC     | -0,133                           | 0,574  | 0,018                          | 1,000 | 1                       | 1  | -0,133                          | 0,574  |
| sasaCDR3b<br>noMHC     | 0,023                            | 0,222  | 0,640                          | 0,849 | 0                       | 0  | 0,000                           | 0,000  |
| sasaCDR1a              | -2,105                           | -1,884 | 0,000                          | 0,000 | 1                       | 1  | -2,105                          | -1,884 |
| sasaCDR1b              | -0,543                           | -0,250 | 0,000                          | 0,005 | 1                       | 1  | -0,543                          | -0,250 |
| sasaCDR2a              | -1,004                           | -1,606 | 0,000                          | 0,000 | 1                       | 1  | -1,004                          | -1,606 |
| sasaCDR2b              | -1,001                           | -0,271 | 0,000                          | 0,008 | 1                       | 1  | -1,001                          | -0,271 |
| sasaCDR3a              | -2,448                           | -1,661 | 0,000                          | 0,000 | 1                       | 1  | -2,448                          | -1,661 |
| sasaCDR3b              | -2,616                           | -2,763 | 0,000                          | 0,000 | 1                       | 1  | -2,616                          | -2,763 |
| rmsfCDR1a              | -0,031                           | -0,001 | 0,000                          | 0,467 | 1                       | 0  | -0,031                          | 0,000  |
| rmsfCDR2a              | -0,018                           | -0,006 | 0,000                          | 0,365 | 1                       | 0  | -0,018                          | 0,000  |
| rmsfCDR3a              | -0,047                           | -0,013 | 0,000                          | 0,082 | 1                       | 0  | -0,047                          | 0,000  |
| rmsfCDR1b              | -0,019                           | 0,001  | 0,000                          | 0,529 | 1                       | 0  | -0,019                          | 0,000  |
| rmsfCDR2b              | -0,009                           | -0,011 | 0,003                          | 0,231 | 1                       | 0  | -0,009                          | 0,000  |
| rmsfCDR3b              | -0,020                           | -0,027 | 0,000                          | 0,006 | 1                       | 1  | -0,020                          | -0,027 |
| gyrABloop              | -0,002                           | 0,010  | 0,296                          | 0,694 | 0                       | 0  | 0,000                           | 0,000  |
| gyrVCAlinker           | -0,003                           | 0,006  | 0,096                          | 0,877 | 0                       | 0  | 0,000                           | 0,000  |
| gyrVCBlinker           | 0,005                            | 0,004  | 0,965                          | 0,652 | 0                       | 0  | 0,000                           | 0,000  |
|                        |                                  |        |                                |       | 1                       | 1  |                                 |        |
| sasaABloop             | -0,003                           | 0,543  | 0,454                          | 1,000 | 0                       | 1  | 0,000                           | 0,543  |
| sasaVCAlinker          | -0,019                           | -0,433 | 0,293                          | 0,001 | 0                       | 1  | 0,000                           | -0,433 |
| sasaVCBlinker          | 0,065                            | -0,096 | 0,889                          | 0,101 | 0                       | 0  | 0,000                           | 0,000  |
| rmsfABloop             | -0,007                           | 0,098  | 0,190                          | 0,977 | 0                       | 1  | 0,000                           | 0,098  |
| rmsfVC_Al linker       | -0,001                           | -0,015 | 0,444                          | 0,225 | 0                       | 0  | 0,000                           | 0,000  |
| rmsfVC_Blinker         | 0,013                            | -0,006 | 0,995                          | 0,387 | 1                       | 0  | 0,013                           | 0,000  |
| n of H-bonds<br>TCRa/b | -0,514                           | 0,608  | 0,014                          | 0,760 | 1                       | 0  | -0,514                          | 0,000  |

**Table S 3: Comparison of the results between the LC13 TCR and the A6 TCR. In the difference column the difference between the mean value of all TCRpMHC simulations versus the mean value all TCR simulation is shown (see methods). The first column shows this for the LC13 TCR and the second column for the A6 TCR. In order to evaluate which differences are more than random we performed a bootstrapping analysis separately for each descriptor and TCR. We assessed the percentile of the observed differences between TCRpMHC and TCR simulations within 1000 random permutations mixing TCRpMHC and TCR values. We consider only the highest 2.5% and the lowest 2.5% as relevant. On this basis we show in the rightest two columns only the difference values that pass either of these thresholds. Differences larger than 0 are highlighted in green while differences smaller than 0 are highlighted in red. The results for using the cohend and tvd instead of the pure difference were similar (data not shown).**
